# Supplementary material for: New Sequence Type ST3449 in Multidrug-Resistant Pseudomonas aeruginosa Isolates from a Cystic Fibrosis Patient
Source: MDPI journal article supplement (doi:10.3390/antibiotics10050491), 2021-04-23
Supplement: s1 [file s1]

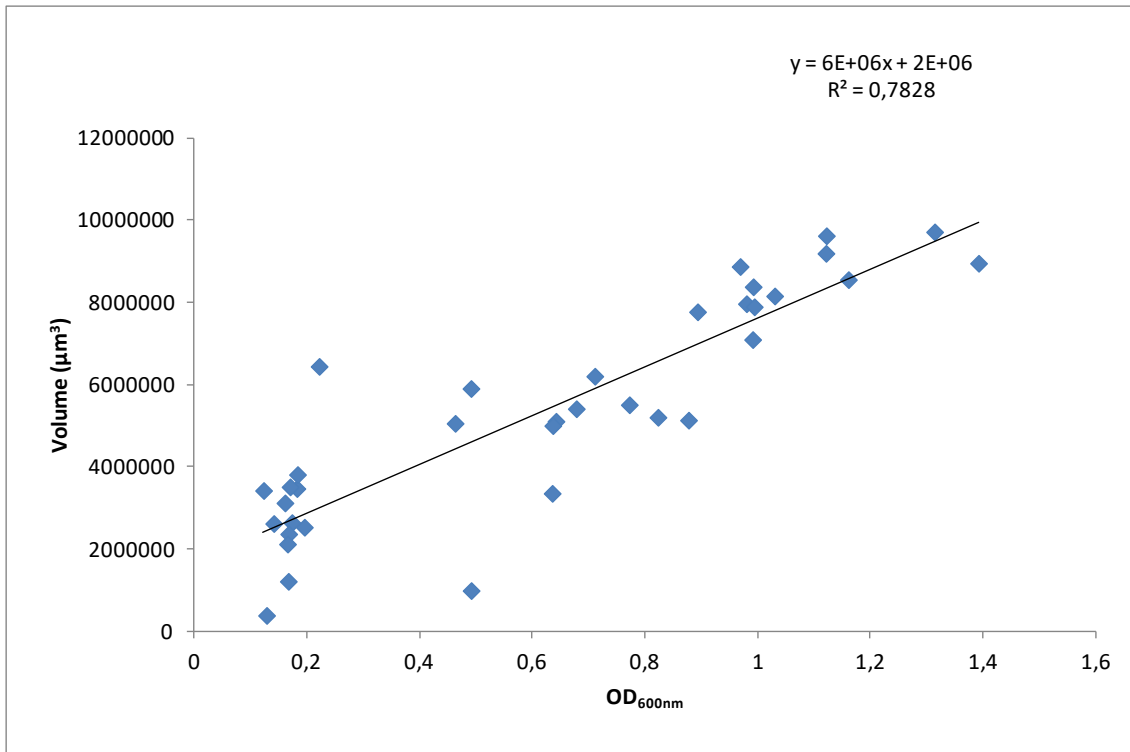

Figure S1. Correlation between the biofilm formation and quantification methods. A substantial correlation ( $R^2=0.7828$ ) between the crystal violet and Film tracer SYPRO Ruby biofilm matrix staining methods was observed.
